# Supplementary material for: The influence of random-coil chemical shifts on the assessment of structural propensities in folded proteins and IDPs
Source: Royal Society of Chemistry journal article supplement (doi:10.1039/d3ra00977g), 2023-01-01
Supplement: d3ra00977g1.pdf [file d3ra00977g1.pdf]

Table S4 ANOVA and Bonferroni results for SRD-CRRN data of non-titratable residues in  $\alpha$ -synuclein at pH=4.21, BMRB 18857.

| $p$ (ANOVA)          | Method           | Mean SRD score | G1   | G2   | G3   | G4   | G5   | G6 |
|----------------------|------------------|----------------|------|------|------|------|------|----|
| <math>10^{-7}</math> | Potenci          | 24.41          | **** |      |      |      |      |    |
|                      | Prosecco neutral | 24.44          | **** |      |      |      |      |    |
|                      | Prosecco acidic  | 25.07          | **** |      |      |      |      |    |
|                      | ncIDP            | 26.59          |      |      | **** |      |      |    |
|                      | Wishart          | 27.79          |      |      |      | **** |      |    |
|                      | Kjaergaard       | 33.18          |      | **** |      |      |      |    |
|                      | Camcoil pH=6.1   | 33.79          |      | **** |      |      |      |    |
|                      | Camcoil pH=2.0   | 34.06          |      | **** |      |      |      |    |
|                      | Wang             | 36.07          |      |      |      |      | **** |    |
| Schwarzinger         | 40.26            |                |      |      |      |      | **** |    |

Table S5 ANOVA and Bonferroni results for SRD-CRRN data of titratable residues in  $\alpha$ -synuclein at pH=7.51, BMRB 18857.

| $p$ (ANOVA)          | Method     | Mean SRD score | G1   | G2   | G3   | G4   |
|----------------------|------------|----------------|------|------|------|------|
| <math>10^{-7}</math> | Potenci    | 16.81          |      | **** |      |      |
|                      | Wishart    | 16.85          |      | **** |      |      |
|                      | ncIDP      | 18.99          | **** |      |      |      |
|                      | Prosecco   | 19.44          | **** |      |      |      |
|                      | Kjaergaard | 20.34          | **** |      |      |      |
|                      | Wang       | 22.49          |      |      | **** |      |
|                      | Camcoil    | 32.10          |      |      |      | **** |

Table S6 ANOVA and Bonferroni results for SRD-CRRN data of non-titratable residues in  $\alpha$ -synuclein at pH=7.51, BMRB 18857.

| $p$ (ANOVA)          | Method     | Mean SRD score | G1   | G2   | G3   | G4   | G5   | G6   | G7   |
|----------------------|------------|----------------|------|------|------|------|------|------|------|
| <math>10^{-7}</math> | ncIDP      | 18.96          | **** |      |      |      |      |      |      |
|                      | Potenci    | 20.08          |      | **** |      |      |      |      |      |
|                      | Wishart    | 22.02          |      |      | **** |      |      |      |      |
|                      | Prosecco   | 24.82          |      |      |      | **** |      |      |      |
|                      | Kjaergaard | 26.53          |      |      |      |      | **** |      |      |
|                      | Wang       | 33.03          |      |      |      |      |      | **** |      |
|                      | Camcoil    | 40.28          |      |      |      |      |      |      | **** |

Tables containing ANOVA and Bonferroni test results for the SRD-CRRN data of  $\alpha$ -synuclein at different temperatures and pH= 5.87 (BMRB 18857). These data augment Fig. 11 of the main text.

Table S7 ANOVA and Bonferroni results for SRD-CRRN data of  $\alpha$ -synuclein at pH=5.87, and T=278 K, BMRB 18857.

| $p$ (ANOVA)          | Method     | Mean SRD score | G1   | G2   | G3   | G4   | G5   | G6   |
|----------------------|------------|----------------|------|------|------|------|------|------|
| <math>10^{-7}</math> | ncIDP      | 17.69          |      | **** |      |      |      |      |
|                      | Wishart    | 24.63          |      |      | **** |      |      |      |
|                      | Prosecco   | 26.93          | **** |      |      |      |      |      |
|                      | Potenci    | 27.48          | **** |      |      |      |      |      |
|                      | Wang       | 29.87          |      |      |      | **** |      |      |
|                      | Kjaergaard | 31.27          |      |      |      |      | **** |      |
|                      | Camcoil    | 41.64          |      |      |      |      |      | **** |

Table S8 ANOVA and Bonferroni results for SRD-CRRN data of  $\alpha$ -synuclein at pH=5.87, and T=288 K, BMRB 18857.

| <i>p</i> (ANOVA)  | Method     | Mean SRD score | G1   | G2   | G3   | G4   | G5   | G6   |
|-------------------|------------|----------------|------|------|------|------|------|------|
| <10 <sup>-7</sup> | nclDP      | 20.35          |      | **** |      |      |      |      |
|                   | Potenci    | 26.31          |      |      | **** |      |      |      |
|                   | Wishart    | 28.67          |      |      |      | **** |      |      |
|                   | Prosecco   | 31.21          |      |      |      |      | **** |      |
|                   | Kjaergaard | 32.65          | **** |      |      |      |      |      |
|                   | Wang       | 33.64          | **** |      |      |      |      |      |
|                   | Camcoil    | 49.07          |      |      |      |      |      | **** |

Table S9 ANOVA and Bonferroni results for SRD-CRRN data of  $\alpha$ -synuclein at pH=5.87, and T=293 K, BMRB 18857.

| <i>p</i> (ANOVA)  | Method     | Mean SRD score | G1   | G2   | G3   | G4   | G5   | G6   |
|-------------------|------------|----------------|------|------|------|------|------|------|
| <10 <sup>-7</sup> | nclDP      | 21.02          |      | **** |      |      |      |      |
|                   | Potenci    | 24.64          |      |      | **** |      |      |      |
|                   | Wishart    | 28.42          | **** |      |      |      |      |      |
|                   | Prosecco   | 28.58          | **** |      |      |      |      |      |
|                   | Kjaergaard | 32.37          |      |      |      | **** |      |      |
|                   | Wang       | 35.01          |      |      |      |      | **** |      |
|                   | Camcoil    | 49.93          |      |      |      |      |      | **** |

Table S10 ANOVA and Bonferroni results for SRD-CRRN data of  $\alpha$ -synuclein at pH=5.87, and T=298 K, BMRB 18857.

| <i>p</i> (ANOVA)  | Method     | Mean SRD score | G1   | G2   | G3   | G4   | G5   | G6   |
|-------------------|------------|----------------|------|------|------|------|------|------|
| <10 <sup>-7</sup> | nclDP      | 22.26          |      | **** |      |      |      |      |
|                   | Potenci    | 24.63          |      |      | **** |      |      |      |
|                   | Prosecco   | 29.62          | **** |      |      |      |      |      |
|                   | Wishart    | 30.82          | **** |      |      |      |      |      |
|                   | Kjaergaard | 33.43          |      |      |      | **** |      |      |
|                   | Wang       | 36.28          |      |      |      |      | **** |      |
|                   | Camcoil    | 51.02          |      |      |      |      |      | **** |

Table S11 ANOVA and Bonferroni results for SRD-CRRN data of  $\alpha$ -synuclein at pH=5.87, and T=303 K, BMRB 18857.

| <i>p</i> (ANOVA)  | Method     | Mean SRD score | G1   | G2   | G3   | G4   | G5   | G6   |
|-------------------|------------|----------------|------|------|------|------|------|------|
| <10 <sup>-7</sup> | nclDP      | 22.93          | **** |      |      |      |      |      |
|                   | Potenci    | 23.67          | **** |      |      |      |      |      |
|                   | Wishart    | 29.20          |      | **** |      |      |      |      |
|                   | Prosecco   | 30.70          |      |      | **** |      |      |      |
|                   | Kjaergaard | 33.03          |      |      |      | **** |      |      |
|                   | Wang       | 37.44          |      |      |      |      | **** |      |
|                   | Camcoil    | 51.08          |      |      |      |      |      | **** |
